# Supplementary material for: Hierarchical trie packet classification algorithm based on expectation-maximization clustering
Source: PLoS One. 2017 Jul 13;12(7):e0181049. doi: 10.1371/journal.pone.0181049 (PMC5509293; doi:10.1371/journal.pone.0181049)
Supplement: S1 Table — (XLSX) [file pone.0181049.s001.xlsx]

## Sheet: Sheet1
	100	200	300	400	500	600	700	800	900	1000
HTEMC	10	21	32	40	57	72	76	92	101	109
PTIAL	12	27	54	57	67	96	98	115	123	130
HTEMC	0.5	1.05	1.6	2	2.85	3.6	3.8	4.6	5.05	5.45
PTIAL	0.6	1.35	2.7	2.85	3.35	4.8	4.9	5.75	6.15	6.5
