# Supplementary material for: Hierarchical trie packet classification algorithm based on expectation-maximization clustering
Source: PLoS One. 2017 Jul 13;12(7):e0181049. doi: 10.1371/journal.pone.0181049 (PMC5509293; doi:10.1371/journal.pone.0181049)
Supplement: S2 Table — (XLSX) [file pone.0181049.s002.xlsx]

## Sheet: Sheet2
	500	1000	1500	2000	2500	3000	3500	4000	4500	5000
HTEMC	40	88	102	113	120	128	180	140	155	146
PTIAL	67	130	148	169	197	230	278	305	327	356
HTEMC	2	4.4	5.1	5.65	6	6.4	9	7	7.75	7.3
PTIAL	3.35	6.5	7.4	8.45	9.85	11.5	13.9	15.25	16.35	17.8
