# Supplementary material for: Hierarchical trie packet classification algorithm based on expectation-maximization clustering
Source: PLoS One. 2017 Jul 13;12(7):e0181049. doi: 10.1371/journal.pone.0181049 (PMC5509293; doi:10.1371/journal.pone.0181049)
Supplement: S3 Table — (XLSX) [file pone.0181049.s003.xlsx]

## Sheet: Sheet1
	500	1000	1500	2000	2500	3000	3500	4000	4500	5000
HTEMC	510	1001	1588	2200	2600	3650	3890	4156	4510	5500
PTIAL	1199	2700	4500	4789	5678	6990	7230	9004	9700	11680
HTEMC	6.8	13.3467	21.1733	29.3333	34.6667	48.6667	51.8667	55.4133	60.1333	73.3333
PTIAL	15.9867	36	60	63.8533	75.7067	93.2	96.4	120.053	129.333	155.733
