# Supplementary material for: Hierarchical trie packet classification algorithm based on expectation-maximization clustering
Source: PLoS One. 2017 Jul 13;12(7):e0181049. doi: 10.1371/journal.pone.0181049 (PMC5509293; doi:10.1371/journal.pone.0181049)
Supplement: S4 Table — (XLSX) [file pone.0181049.s004.xlsx]

## Sheet: Sheet2
	100	200	300	400	500	600	700	800	900	1000
HTEMC	110	190	299	370	550	1099	1489	1563	1561	1899
PTIAL	203	410	700	930	1199	1500	1733	1899	2313	2700
HTEMC	1.46667	2.53333	3.98667	4.93333	7.33333	14.6533	19.8533	20.84	20.8133	25.32
PTIAL	2.70667	5.46667	9.33333	12.4	15.9867	20	23.1067	25.32	30.84	36
