# Supplementary material for: Hierarchical trie packet classification algorithm based on expectation-maximization clustering
Source: PLoS One. 2017 Jul 13;12(7):e0181049. doi: 10.1371/journal.pone.0181049 (PMC5509293; doi:10.1371/journal.pone.0181049)
Supplement: S5 Table — (XLSX) [file pone.0181049.s005.xlsx]

## Sheet: Sheet1
	10	20	30	40	50	60	70	80	90	100	110	120
HTEMC	260	300	290	320	330	319	295	305	299	307	315	310
HDCuts	1062	1123	1155	1129	1121	1163	1169	1149	1186	1199	1221	1232
GroupCuts	650	720	730	756	780	779	821	816	834	859	899	924
