# Supplementary material for: Hierarchical trie packet classification algorithm based on expectation-maximization clustering
Source: PLoS One. 2017 Jul 13;12(7):e0181049. doi: 10.1371/journal.pone.0181049 (PMC5509293; doi:10.1371/journal.pone.0181049)
Supplement: S6 Table — (XLSX) [file pone.0181049.s006.xlsx]

## Sheet: Sheet1
	10	20	30	40	50	60	70	80	90	100	110	120
HTEMC	60	62	63	65	73	72	73	72	73	74	75	76
HDCuts	23	20	19	23	25	28	22	26	23	26	23	20
GroupCuts	38	35	40	42	46	42	45	48	45	48	49	45
